# Supplementary material for: Regulating defects and interfacial compatibility of porous carbon derived from oxygen-containing composites to enhance oxygen reduction in aqueous electrolytes
Source: Royal Society of Chemistry journal article supplement (doi:10.1039/d3se00082f), 2023-01-01
Supplement: d3se00082f1.pdf [file d3se00082f1.pdf]

## Supplementary Information

### **Regulating defects and interfacial compatibility of porous carbon derived from oxygen contained composites to enhance oxygen reducing in aqueous electrolyte**

*Zheng Li,<sup>a</sup> Chenfan Yang,<sup>\*b</sup> Guoning Mao,<sup>b</sup> and Qiyu Wang<sup>\*a</sup>*

<sup>a</sup> School of Metallurgy and Environment, Central South University, Changsha 410083, China.

<sup>b</sup> China North Engine Research Institute (Tianjin), Tianjin 300400, China.

\*Corresponding authors.

*E-mail addresses:* chenfany1018@163.com (C. Yang), wangqiyucsu@163.com (Q. Wang)

## Supporting Experimental Details

*Characterization of the materials:* A field-emission scanning electron microscopy (FESEM, FEI Quanta-200) and a scanning transmission electron microscopy (STEM, MIRA3 TESCAN) were taken to run morphology tests. Expressions for chemical states of the carbon, nitrogen and sulfur in the material were performed by X-ray photoelectron spectroscopy (XPS, ESCA LAB 250Xi).

*The Koutechy-Levich (K-L) equation:* The average electron transfer number of made samples could be calculated from the slope of the K-L equation.

The K-L equation is given as follows:

$$\frac{1}{j} = \frac{1}{j_k} + \frac{1}{B\omega^{0.5}}$$

where  $j_k$  is the kinetic current and  $\omega$  is the electrode rotating rate.  $B$  could be determined from the slope of the K-L plots based on the Levich equation as follows:

$$B = 0.2nF(D_{O_2})^{2/3}\nu^{-1/6}C_{O_2}$$

where  $n$  represents the number of electrons transferred per oxygen molecule,  $F$  is the Faraday constant ( $F = 96485 \text{ C mol}^{-1}$ ),  $D_{O_2}$  is the diffusion coefficient of  $O_2$  in 0.1 M KOH ( $1.9 \times 10^{-5} \text{ cm}^2 \text{ s}^{-1}$ ),  $\nu$  is the kinetic viscosity ( $0.01 \text{ cm}^2 \text{ s}^{-1}$ ), and  $C_{O_2}$  is the bulk concentration of  $O_2$  ( $1.2 \times 10^{-6} \text{ mol cm}^{-3}$ ). The constant 0.2 is adopted when the rotation speed is expressed in rpm.

## Supporting Figures

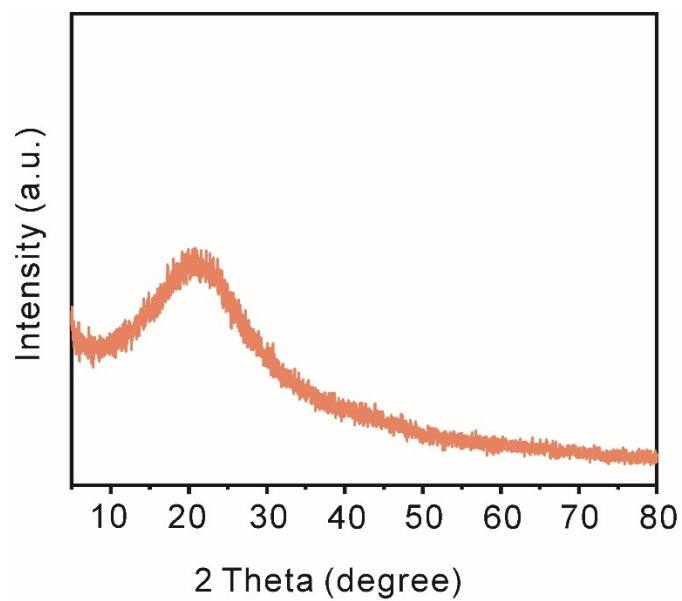

**Fig. S1** XRD pattern of brown precursors.

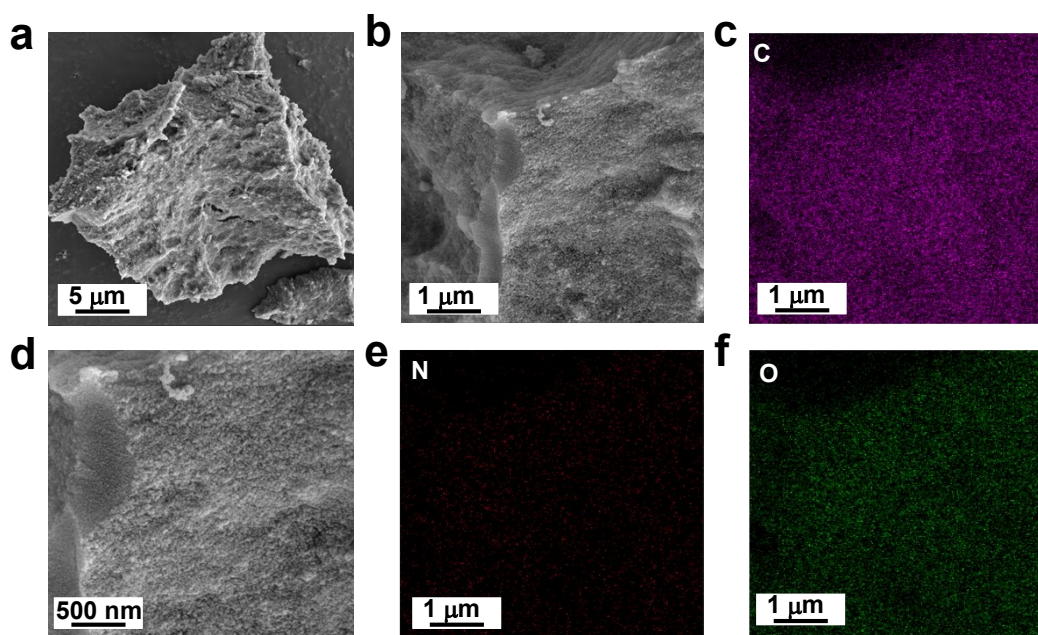

**Fig. S2** a, d) SEM and b, c, e and f) elemental mapping images of precursor.

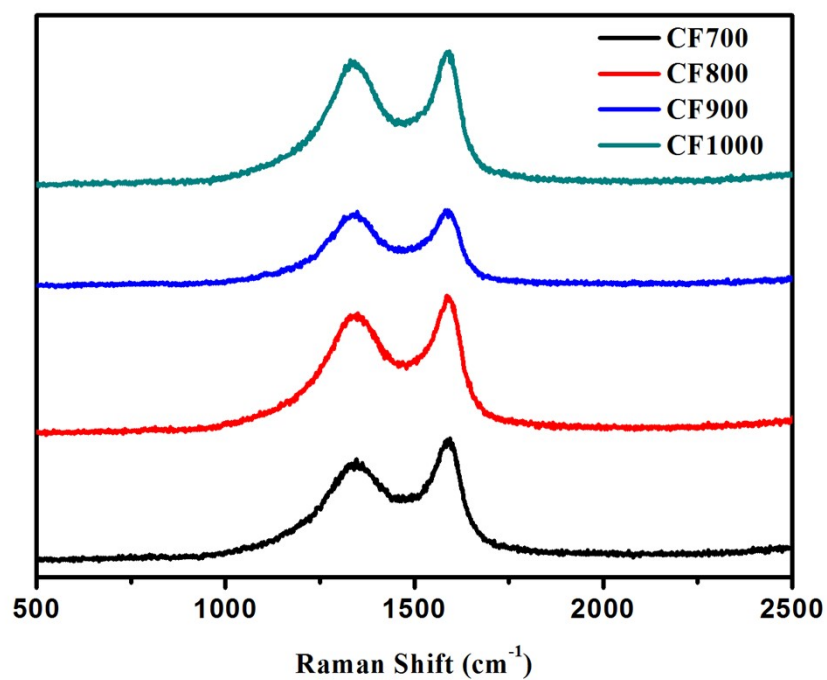

**Fig. S3** Raman spectra of CF700, CF800, CF900 and CF1000.

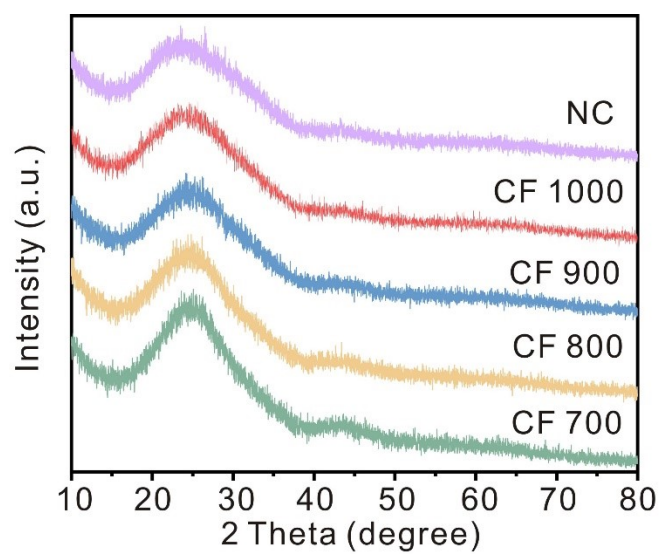

**Fig. S4** XRD pattern of CF700, CF800, CF900, CF1000 and NC.

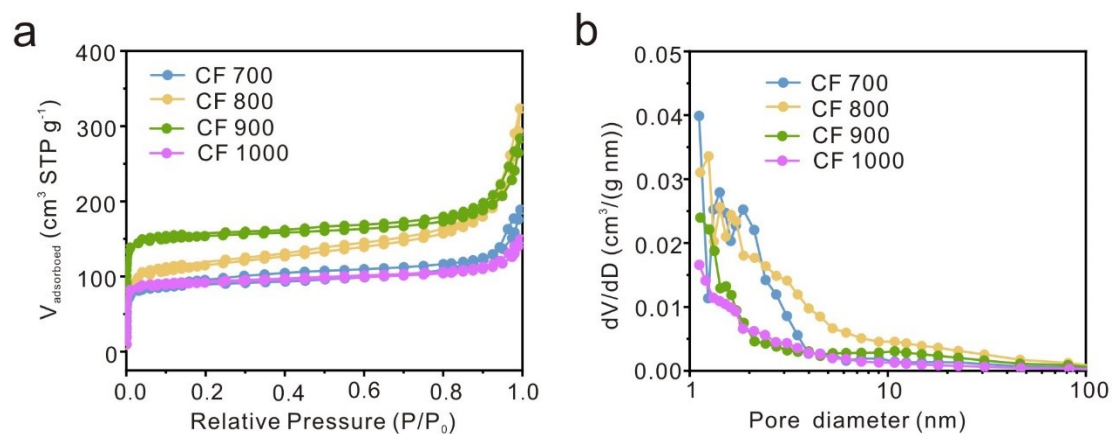

**Fig.S5** a)  $N_2$  adsorption-desorption isotherms with the corresponding; b) PSD curves of CF700, CF800, CF900 and CF1000.

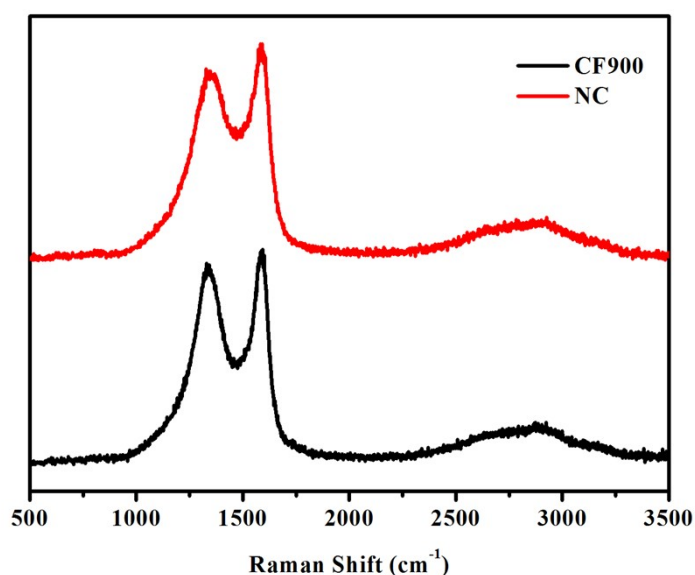

**Fig. S6** Raman spectra of CF900 and NC.

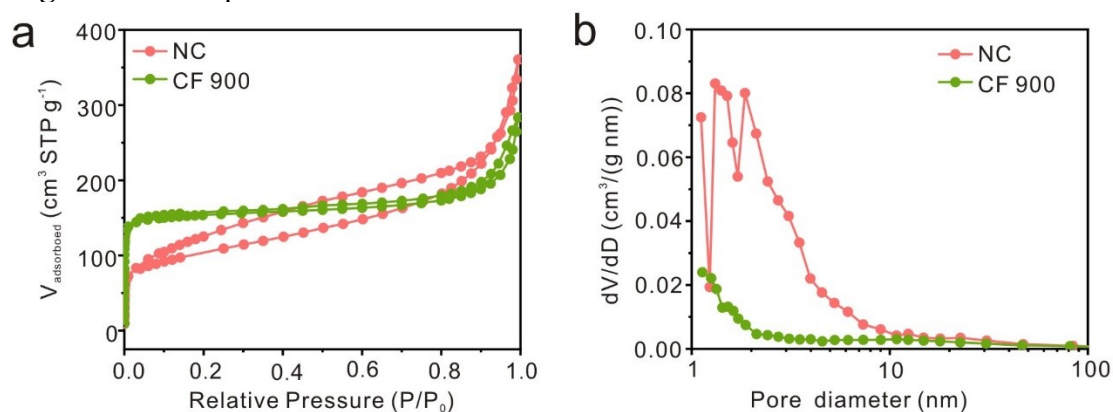

**Fig. S7** a)  $N_2$  adsorption-desorption isotherms with the corresponding; b) PSD curves of CF900 and NC.

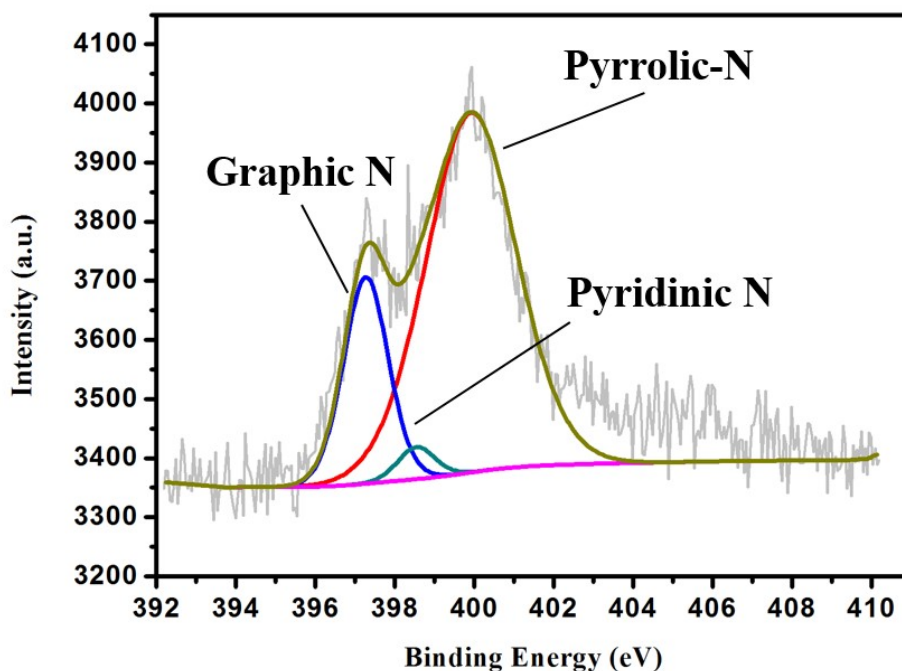

**Fig. S8** XPS survey spectrum of NC with the N 1s spectra.

**Table S1.** Textural properties of carbon materials.

| Sample | BET surface area <sup>[a]</sup><br>/ m <sup>2</sup> g <sup>-1</sup> | Total pore volume <sup>[b]</sup><br>/ cm <sup>3</sup> g <sup>-1</sup> | Micropore volume <sup>[c]</sup><br>/ cm <sup>3</sup> g <sup>-1</sup> |
|--------|---------------------------------------------------------------------|-----------------------------------------------------------------------|----------------------------------------------------------------------|
| CF700  | 353.4                                                               | 0.292                                                                 | 0.129                                                                |
| CF800  | 422.8                                                               | 0.500                                                                 | 0.128                                                                |
| CF900  | 612.8                                                               | 0.439                                                                 | 0.217                                                                |
| CF1000 | 362.1                                                               | 0.231                                                                 | 0.127                                                                |
| NC     | 453.6                                                               | 0.558                                                                 | 0.091                                                                |

[a] Determined by multipoint BET method within the relative pressure ( $P/P_0$ ) range of 0.01 to 0.2. [b] Obtained at the relative pressure ( $P/P_0$ ) range of 0.98. [c] Determined by t-plot method within the relative pressure ( $P/P_0$ ) range of 0.2 to 0.5.

**Table S2.** Comparison of the AAB performances of different carbon-based catalyst.

| Catalysts  | Cell<br>Type/Electrolyte                                                                                                    | Discharge<br>Voltage<br>/V | Current<br>Densities<br>/mA cm <sup>-2</sup> | Ref          |
|------------|-----------------------------------------------------------------------------------------------------------------------------|----------------------------|----------------------------------------------|--------------|
| NC         | Flow/ Liquid<br>6 M KOH + 0.01<br>M Na <sub>2</sub> SnO <sub>3</sub> +<br>0.0005 M<br>In(OH) <sub>3</sub> + 0.0075<br>M ZnO | 1.36                       | 50                                           | This<br>work |
| Commercial | Flow/Liquid                                                                                                                 | 0.9                        | 100                                          | 1            |

|             |                                                                                                                              |      |     |              |
|-------------|------------------------------------------------------------------------------------------------------------------------------|------|-----|--------------|
| manganese   | 4 M NaOH +<br>0.05M Na <sub>2</sub> SnO <sub>3</sub>                                                                         |      |     |              |
| 20% Pt/C    | Flow/ Liquid<br>6 M KOH + 0.01<br>M Na <sub>2</sub> SnO <sub>3</sub> +<br>0.0005 M<br>In(OH) <sub>3</sub> + 0.0075<br>M ZnO  | 1.32 | 50  | This<br>work |
| SMNP        | Flow/Liquid<br>6 M KOH                                                                                                       | 0.9  | 100 | 2            |
| Co SANC-850 | Static/Liquid<br>6 M KOH + 0.01<br>M Na <sub>2</sub> SnO <sub>3</sub> +<br>0.0005 M<br>In(OH) <sub>3</sub> + 0.0075<br>M ZnO | 1.3  | 200 | 3            |
| Cu-Fe-N-C   | Flow/ Liquid<br>6 M KOH + 0.01<br>M Na <sub>2</sub> SnO <sub>3</sub> +<br>0.0005 M<br>In(OH) <sub>3</sub> + 0.0075<br>M ZnO  | 1.5  | 40  | 4            |

---

### Supporting References

1. Y. Zhang, H. Tao, J. Liu, Y. Sun, J. Chen, B. Hua, T. Thundat, J. Luo, *Nano Energy*, **2017**, 37, 392-400.
2. J. Ryu, H. Jang, J. Park, Y. Yoo, M. Park, J. Cho, *Nat Commun*, **2018**, 9, 3715.
3. B. Wang, K. Liu, X. Yang, M. Liu, T. Chan, X. Qiu, J. Li, W. Li, *J. Mater. Chem. A* **2020**, 8, 2131-2139.
4. J. Li, J. Chen, H. Wan, J. Xiao, Y. Tang, M. Liu, H. Wang. *Appl. Catal. B*, **2019**, 242, 209.
